# Supplementary material for: Randomised trials conducted using cohorts: a scoping review
Source: HighWire-hosted journal article supplement (doi:10.1136/bmjopen-2023-075601), 2024-03-01
Supplement: bmjopen-2023-075601supp002_data_supplement.pdf [file bmjopen-2023-075601supp002_data_supplement.pdf]

*Inclusion/Exclusion criteria for studies*

Adapted from protocol for a scoping review to support development of a CONSORT extension for randomised controlled trials using cohorts and routinely collected health data(24).

**Exclude:** The publication is NOT reporting trials conducted using cohorts, protocols for RCTs that will be conducted using cohorts, describing a cohort intended to be used or has been used to conduct RCTs or methodological papers describing the use of cohorts. If the study involves non-human subjects it will be excluded.

**Include:** The publication describes an RCT in which the cohort is used or will be used to identify trial participants. The publication describes a cohort used to identify trial participants.

**Include:** The publication describes an RCT in which the cohort is used or will be used to ascertain health outcomes. The publication describes a cohort used to ascertain health outcomes.

Include: The methodological papers describe the use of cohorts for RCTs.
